# Supplementary material
Source: MDPI journal article supplement (https://www.mdpi.com/2673-7086/4/2/19)
Supplement: s1 [file s1]

**Table S1.** Accuracy assessment of farm utua2.

[illegible]

**Table S2.** Accuracy assessment of farm utua16.

[illegible]
